# Supplementary material for: A transcription factor network responsive to high CO2/hypoxia is involved in deastringency in persimmon fruit
Source: PubMed Central journal article supplement (PMC6018754; doi:10.1093/jxb/ery028), 2018-01-30
Supplement: ery028_suppl_supplementary_figures_s1-s7_tables_s1-s8.pdf [file ery028_suppl_supplementary_figures_s1-s7_tables_s1-s8.pdf]

**Figure S1**

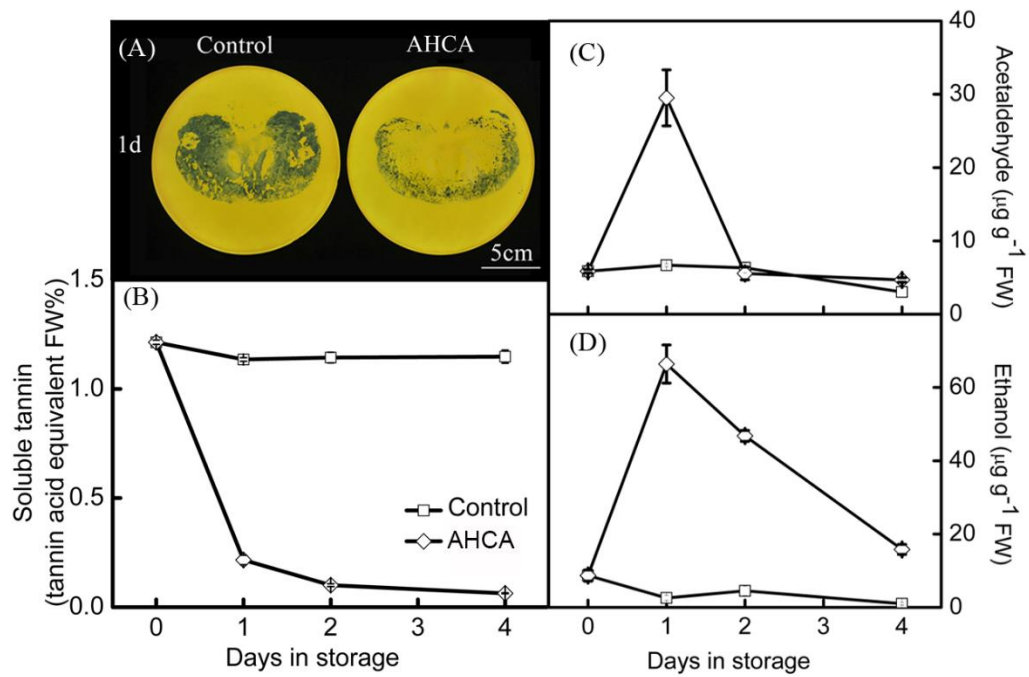

**Figure S1** Effects of AHCA (95 %  $\text{CO}_2$  + 1 %  $\text{O}_2$ , 1 d) treatment on ‘Mopanshi’ persimmon fruit postharvest deastringency at 20 °C

**Figure S2**

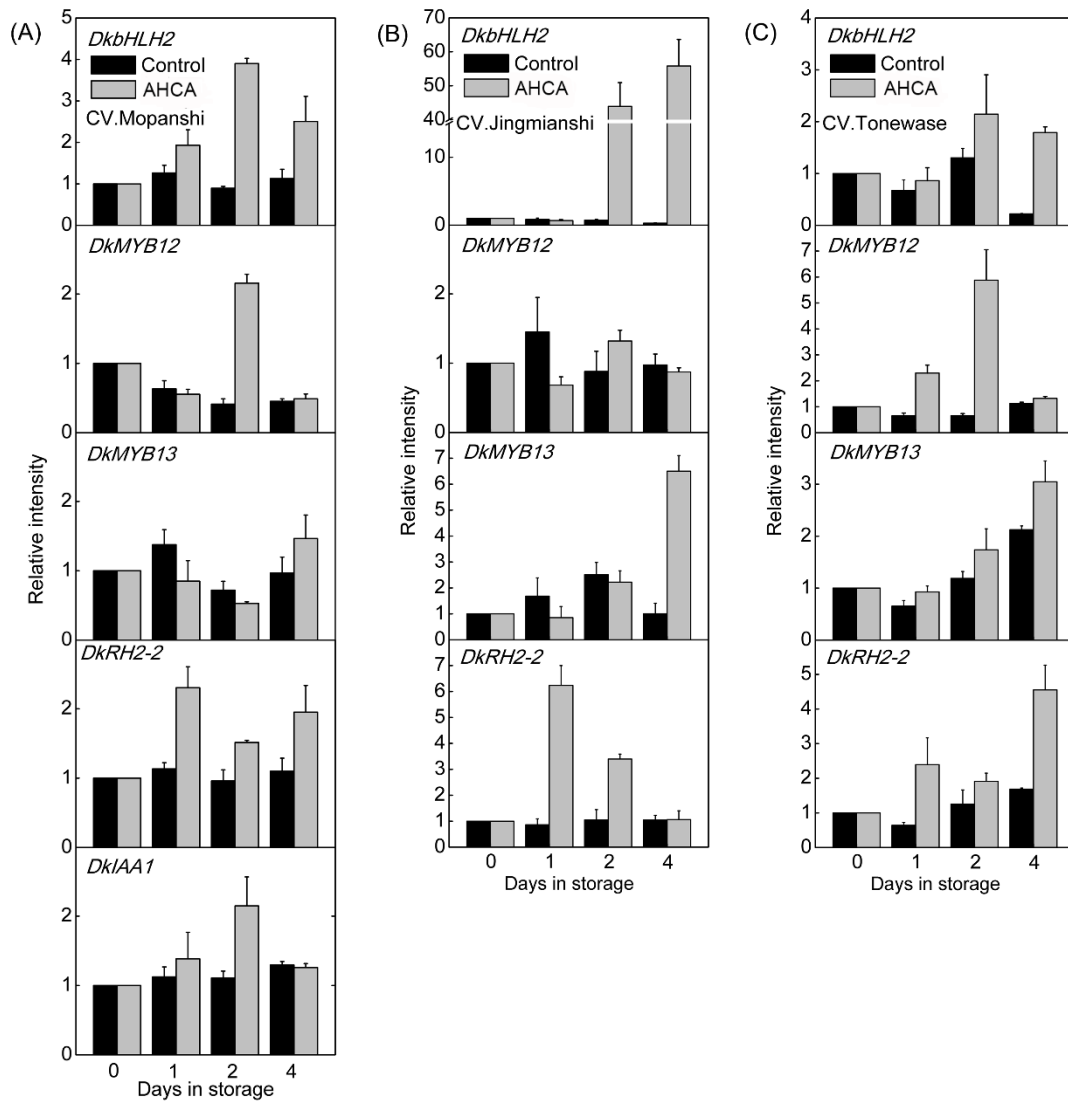

**Figure S2.** Expression of transcription factors were less responsive to AHCA treatment (*DkIAA1* did not express in 'Jingmianshi' and 'Tonewase')

**Figure S3**

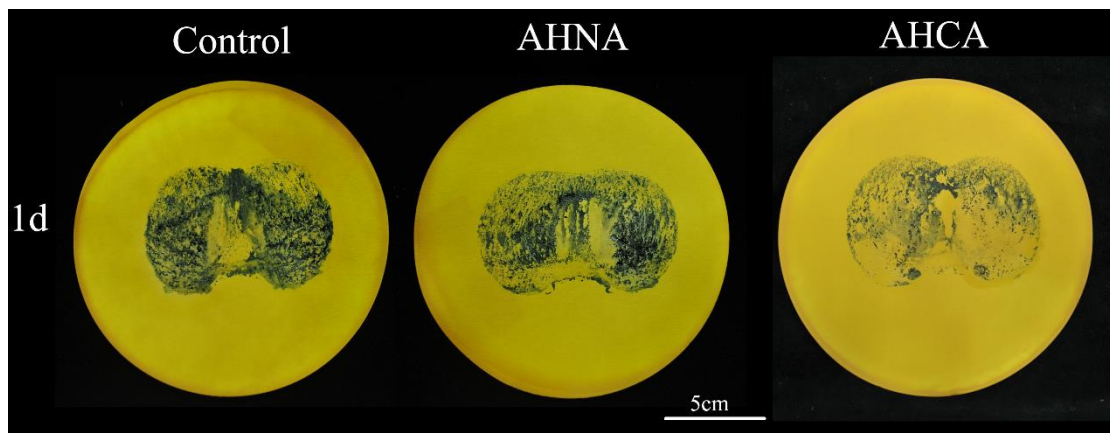

**Figure S3.** Comparison of tannin printing of control and AHNA and AHCA treated "Gong cheng-shui shi" fruit at 1 day in storage.

Figure S4

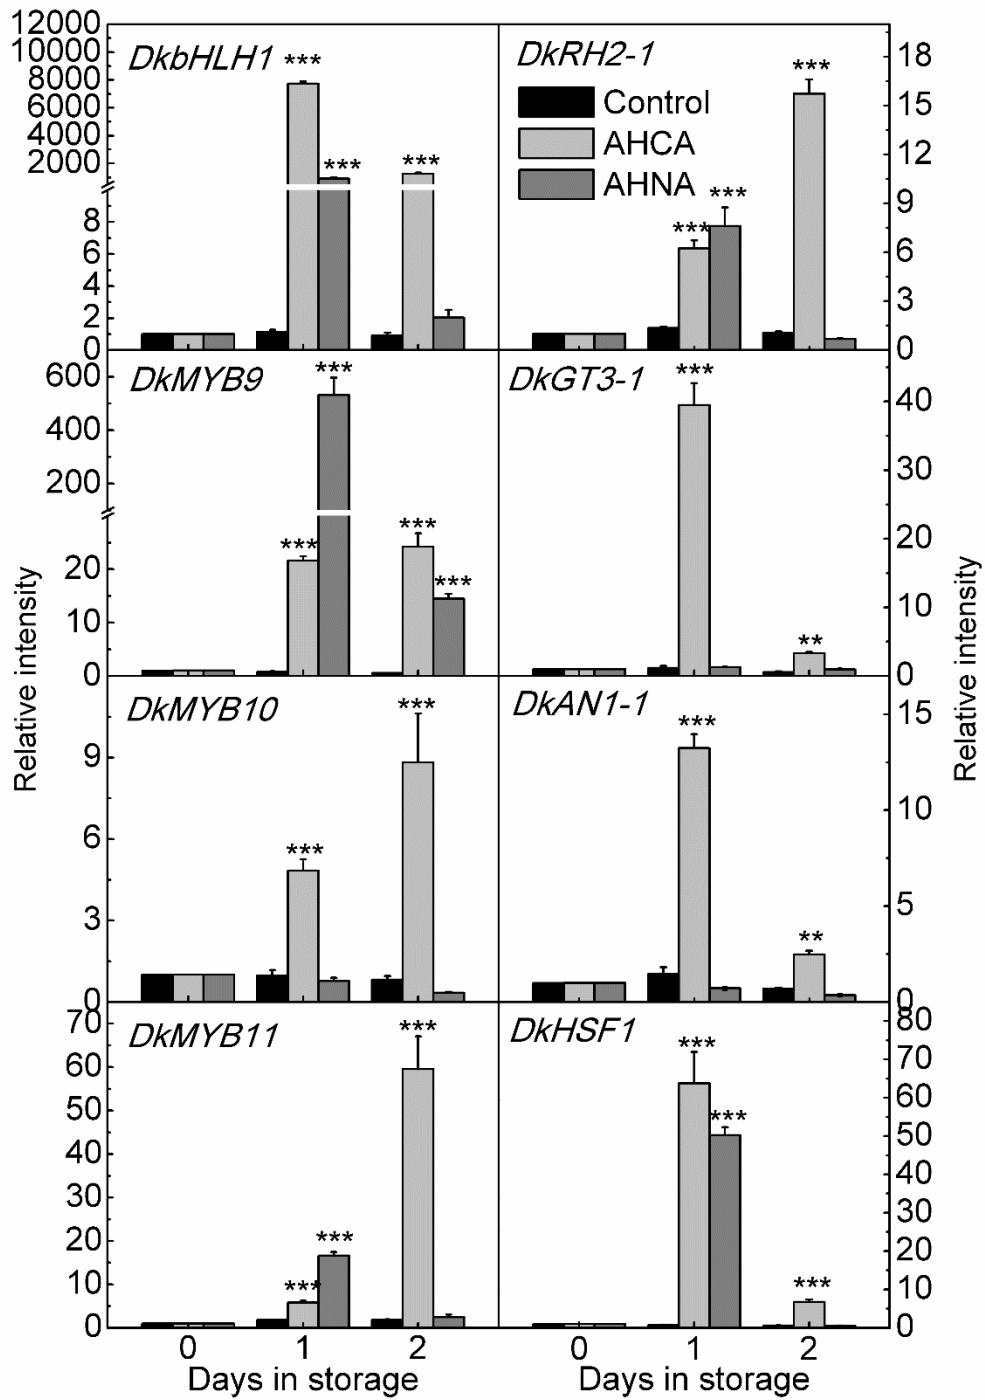

Figure S4. Expression of transcription factors were responsive to AHCA and AHNA treatment in “Gong cheng-shui shi”

**Figure S5**

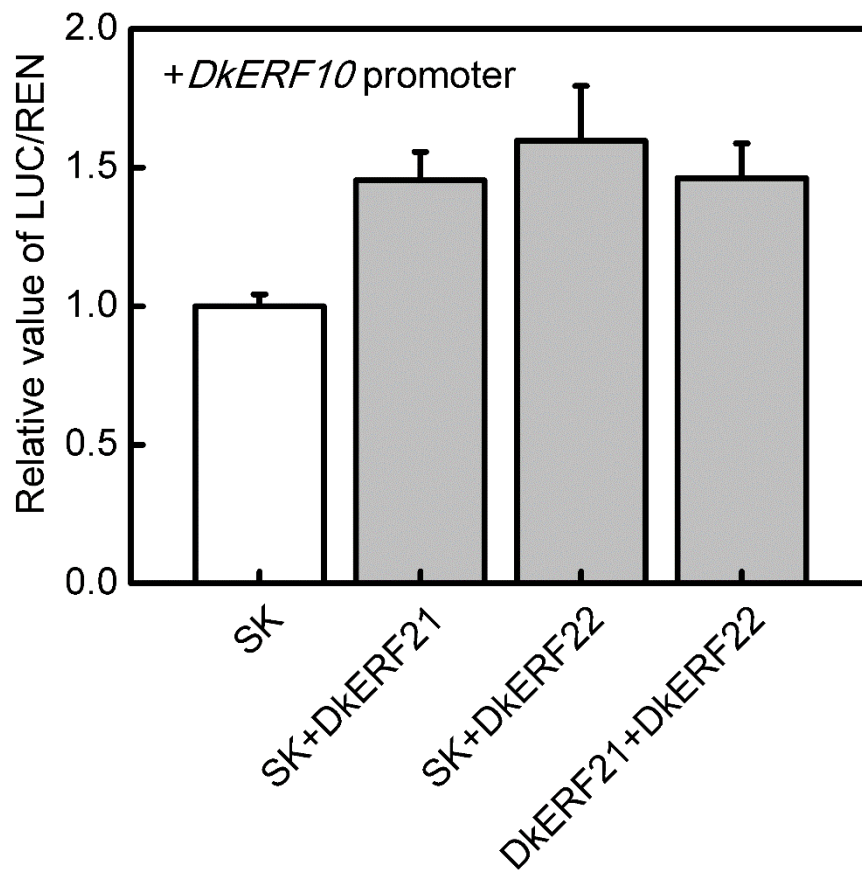

**Figure S5.** Synergistic trans-activation effect of combination of DkERF21 and DkERF22 on *DkERF10* promoter.

**Figure S6**

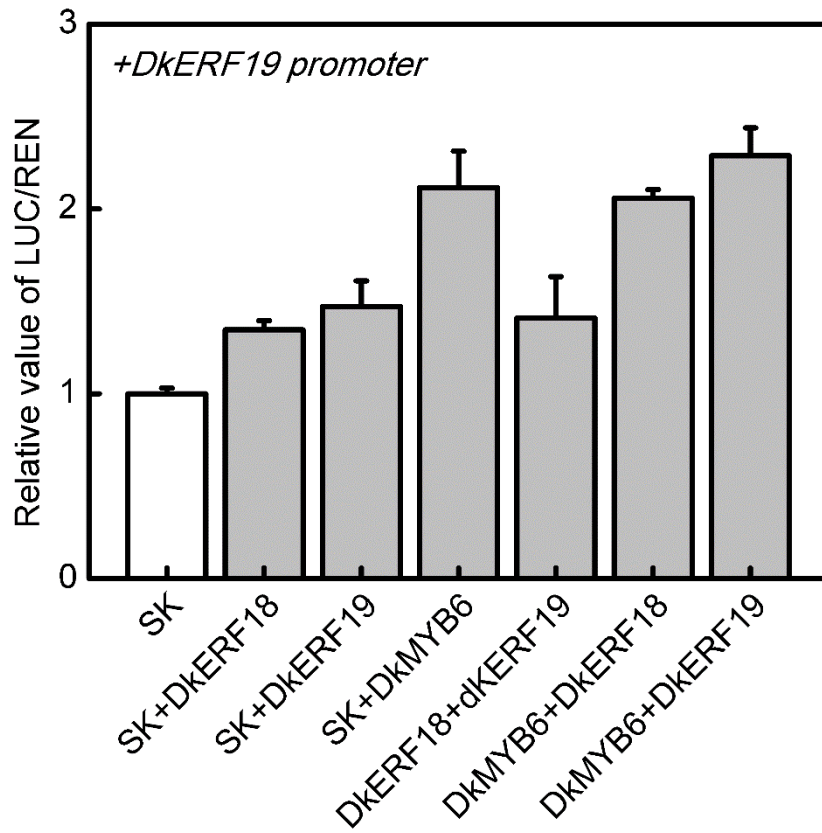

**Figure S6.** Synergistic trans-activation effect of combination of DkMYB6 and DkERF18/19 on *DkERF19* promoter.

Figure S7

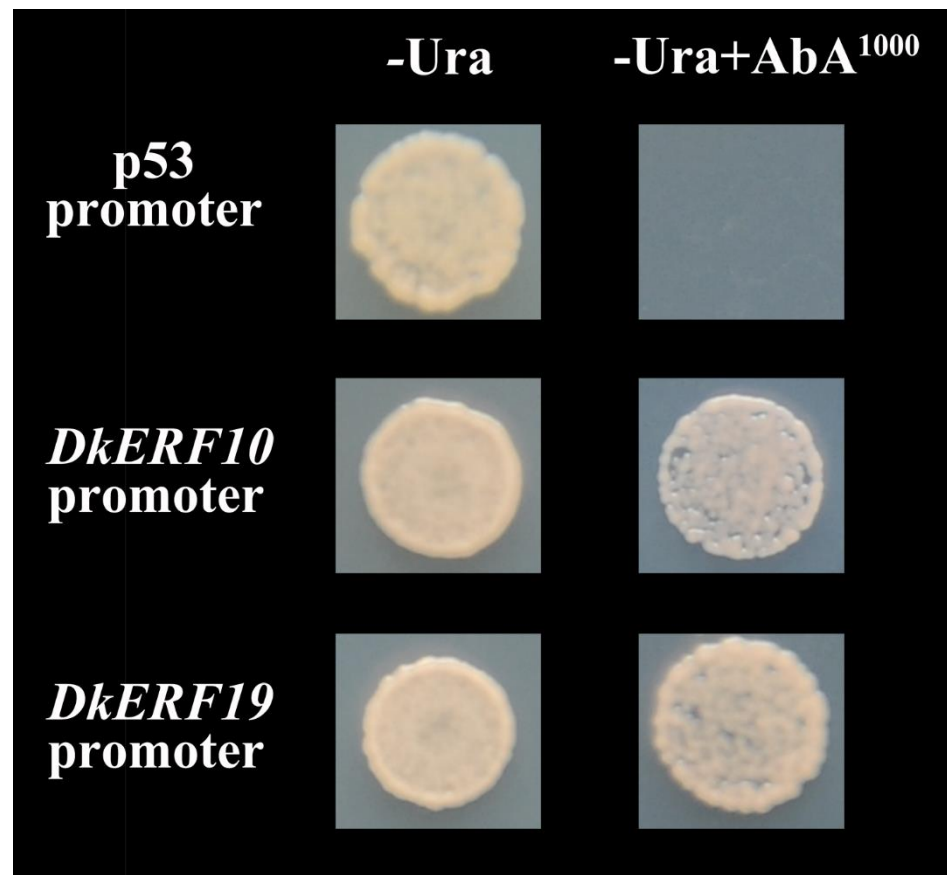

Figure S7. Auto-activation test for *DkERF10/19* promoters

## Supplemental Table 1

### Primer sequences for 3'-RACE analysis

| Gene           | Gene-specific primer (5' to 3') | Nested gene-specific primer (5' to 3') |
|----------------|---------------------------------|----------------------------------------|
| <i>DkMYB9</i>  | GACCATCATCAGCAATCCATTCGTCAA     | CAGAATCATCATGATCAGAACAATATTC           |
| <i>DkMYB10</i> | CGCCACCTTCTTCTACTCCGGCCGCGGC    | GGTGGATGGGCTTAGTAATGATGAAGTG           |
| <i>DkMYB11</i> | GGTCTGTCATAGCTGCTCAACTACCAGG    | CGGGCAACCATGAAGACAACCTCATGGCG          |
| <i>DkMYB12</i> | CGGCGTCGCCGCGGATCCAGCCTTTTCG    | GCCGGCAAAGCTCATCCATCCTACTCCA           |
| <i>DkMYB13</i> | GAACGGACAACGAGATCAAGAATTACTG    | CCTGGAGCTGAGAATTAGCGCTCCACAC           |
| <i>DkbHLH1</i> | CATGGCCAACAACGACCGAGTTCCAGGC    | CTATCAGGAAGCTAGGATTAAGAGAGCG           |
| <i>DkbHLH2</i> | CATCAGGCACCAGAGATCCAGTAAAGGC    | GGCCTCTGCCGGCGAGGGCACATCTTCT           |
| <i>DkRH2-1</i> | CCCGGGAGATGCAAAGAAGAAGATGAAG    | GGTGGGTTGACCATGGCCAAGCCACTTG           |
| <i>DkRH2-2</i> | GTTGTCGTCGAGCTGTGAACGGATTGCA    | CCAGAATTCGCAACCACCTCTGTGGTTG           |
| <i>DkGT3-1</i> | GCTATGGGTGGAAGCTGAAGCGGAGCG     | CAACAGTTTGAAGGAGAGTTTGGAGGAG           |
| <i>DkHSF1</i>  | CACTGCAAGTTCTCGGTGTCCACCCTCG    | GCTTGAAAGCGGATGCCTATGTCTATG            |
| <i>DkIAA1</i>  | CACCAGCTTCTGCCAATCCAGCTGTGCC    | CGCTGTCCCAAGCAAGCCTCCCCTGAA            |
| <i>DkANI-1</i> | GTTGTGGTCTGCGAAATCTGCTCCACGG    | GGCACGAGAAGTCCGACGTCTGCGATCC           |



## Supplemental Table 2

### Primer sequences for 5-RACE analysis

| Gene           | Gene-specific primer (5' to 3') | Nested gene-specific primer (5' to 3') |
|----------------|---------------------------------|----------------------------------------|
| <i>DkMYB9</i>  | GCGAAGCAAATGGGAATTTGACGAATGG    | AACCGTCGCCTCCGCCAGTTTAGTGAGC           |
| <i>DkMYB10</i> | CTTTCTTGAAGGGATGAAAAGCACCGCC    | TTGTCATTGCTCTTGCCATCTTATGAG            |
| <i>DkMYB11</i> | TGCAGCTGCCATTTGCTTCTTCGTCTTC    | GACAACTCTTGCCACAGCGCTTCAATCC           |
| <i>DkMYB12</i> | GCTGGCAACTTGTGTTGGCGTGCGGGTC    | GCGGCTGCAACGTCGTCGCCGTTGGAGG           |
| <i>DkMYB13</i> | GCTCGTTCATCGGTCTGTGGGTTACCGG    | GGGGAGGGAGCGCCAGCAGCCCTCGCCG           |
| <i>DkbHLH1</i> | GGCTCTCCATGGACAGCGATCTGAGCG     | GCTGGGCTTCGGCGGAGGCCAGACCTTG           |
| <i>DkbHLH2</i> | TTCCAGCCTTTACTGGATCTCTGGTGCC    | AGAAGCTTGCGAAGTTTTGAGCTCTTCC           |
| <i>DkRH2-1</i> | TCTTCATCTTCTTCTTTGCATCTCCCGG    | CTTCTCCTTGTCTCCTTCGAACAGTGGG           |
| <i>DkRH2-2</i> | TGGTTAGAGCCACTAAGGCAAGCTATGG    | CCTGGGTATCCACAAGGCTTGGGTTGGC           |
| <i>DkGT3-1</i> | CGCTCTCCTCGTTGTCGTCGTCGTCGTC    | CATTTGCATTTGCACTGCTCCGCGCTGC           |
| <i>DkHSF1</i>  | CGTTGACAAACTCCCATCTATCTGGATC    | GGAGGGAAAGAATCAAGAAGCCCCTCCC           |
| <i>DkIAA1</i>  | GGCACAGCTGGATTGGCAGAAGCTGGTG    | CCTGGTGGAGCAAGCCTCAACTCAAGGC           |
| <i>DkANI-1</i> | GCAGACGTCGGACTTCTCGTGCCTCTCC    | GGACCTGTACGATCTGTGCTCCAAACAG           |

### Supplemental Table 3

#### Primer sequences for full length TFs

| Gene           | Gene-specific primer (5' to 3') | Nested gene-specific primer (5' to 3') |
|----------------|---------------------------------|----------------------------------------|
| <i>DkMYB9</i>  | GGACGCCTGAAGAAGATCAGAC          | CAGCTCTTTCACATTAATCCTTCC               |
| <i>DkMYB10</i> | GGATCTCTCTATGCTCATACC           | CTCTAATTAGTATCTGAACCGAAG               |
| <i>DkMYB11</i> | GCAGCCATGGGAAGAGCTCCCTGC        | GTAGGTAGTAGGTTCCCTATGAAG               |
| <i>DkMYB12</i> | CCTGATTCCTAGAAGAAGACCGCC        | CAACTGATTACAACAAGACATCAC               |
| <i>DkMYB13</i> | GGGCCTGCTGCTCAATTAAGC           | CTCTCTCTCTCCTTGTTGCTAC                 |
| <i>DkbHLH1</i> | GGAGAGACAAAGAGAGAGAGGGAG        | CATTGACCATAACCTGTCGCCGCC               |
| <i>DkbHLH2</i> | GTAGCCTAACCACCAGTTTCAC          | CTTCTTCCTGAATATTATGGAGC                |
| <i>DkRH2-1</i> | CTAACGCCACCACATGTGAGAAG         | CGAACACCCTCCTCCCTCAGAGG                |
| <i>DkRH2-2</i> | GATGGCCACCCAAATTAATAAAAC        | CGAAACTGTAAACCATCGATGGCC               |
| <i>DkGT3-1</i> | GGTGGAGAATCTGATTCATATATC        | GTTGCAAGACAAACCTCTCATGGC               |
| <i>DkHSF1</i>  | GGAGAAACCTGCTCATGAATATTG        | CATTGTTGAACAGATTACTTATCCG              |
| <i>DkIAA1</i>  | GATCTGGGTGTTCACTAGGTTTTG        | GAAACACGTCATACACAGTTGCTCC              |
| <i>DkANI-1</i> | CCTCATCCAGTTCAAGAAGCAAG         | GAATCTCAGCAAACAATTTGTGCC               |

## Supplemental Table 4

Table S4. Primer sequences for Real-time PCR analysis

| Gene           | Gene-specific primer (5' to 3') | Nested gene-specific primer (5' to 3') |
|----------------|---------------------------------|----------------------------------------|
| <i>DkMYB9</i>  | AGATTTGCCGGCATTAAACAA           | TCACACTACCAGCTCTTTCACA                 |
| <i>DkMYB10</i> | GTCTAGAGCAGCCGGAGCTA            | CCGGAGAATTGGAACGAG                     |
| <i>DkMYB11</i> | GGGATTTGATATTAAGGGCATT          | GGTCCAGACCCTAGCTTTCA                   |
| <i>DkMYB12</i> | TTGGCCTTGGTCATTTGTCT            | CAAATGGAATGCCATGACTG                   |
| <i>DkMYB13</i> | TCAGAAGCTTGAAATGAAATG           | TCGATCCCGACAATCATACA                   |
| <i>DkbHLH1</i> | TTCACCATTTTCCCCCATTA            | TCACTTGGATGGGATTTTCTG                  |
| <i>DkbHLH2</i> | CAGAAAGTGGTTTCGTGAAGA           | TCTGGACACTGAAAGAAAGCAG                 |
| <i>DkRH2-1</i> | TCGATAAGTCCAACCAGCTCT           | AACACCCTCCTCCCTCAGA                    |
| <i>DkRH2-2</i> | CGATCCGAATTTGGACTATGA           | CCATACTCCCTTCTACGTATCACA               |
| <i>DkGT3-1</i> | GCTAGGTACCTCAGTAGTGGTTG         | TGCATGTGGTGTAATTAAGACG                 |
| <i>DkHSF1</i>  | ACGTGAAGAAAGGGGAGCTT            | CCATTCAATTCCCTCTCCA                    |
| <i>DkIAA1</i>  | AGCTCTCCTCGTTGTGCTGT            | TTTGGTGGGAAAATGAGAGC                   |
| <i>DkANI-1</i> | ATTTCTCCGCCCAATACTCC            | CCAAATTGGTCTTGGTGTGA                   |

## Supplemental Table 5

### Primer sequences for dual-luciferase assay experiment

| Gene    | Gene-specific primer (5' to 3') | Nested gene-specific primer (5' to 3') |
|---------|---------------------------------|----------------------------------------|
| DkMYB9  | CGCGCGGCCGCATGTGTGTGTGTGTGTGTGT | GATACTAGTTCATTTATCGAGACGAGG            |
| DkMYB10 | CGCGCGGCCGCATGATCCGCAATACCCAC   | GATACTAGTTCATGTGCTACGAGTAGA            |
| DkMYB11 | CGCGCGGCCGCATGGGAAGAGCTCCCTGC   | GATACTAGTTCATATATAGAGCCCTCG            |
| DkbHLH1 | CGCGCGGCCGCATGGACTCCATCTTCCTG   | GATACTAGTTCAGTGTGCCATGTCAGC            |
| DkRH2-1 | CGCGCGGCCGCATGTTGTCAAGATCATTT   | GATACTAGTTCACTGGAAAAGGGAATC            |
| DkGT3-1 | CGCGCGGCCGCATGGAAGGAGGGCATCAC   | GATACTAGTCTACAAGTCGTCTCTTCC            |
| DkHSF1  | CGCGCGGCCGCATGAATATTTCTCCAGGC   | GATACTAGTTCACTCCCCTTCATTCAA            |
| DkAN1-1 | CGCGCGGCCGCATGGCAGGAACAGAGGCT   | GATACTAGTTTAACATGCTTTGACAGA            |

## Supplemental Table 6

### Primer sequences for yeast experiment

| Gene    | Gene-specific primer (5' to 3')               | Nested gene-specific primer (5' to 3')       |
|---------|-----------------------------------------------|----------------------------------------------|
| DkMYB10 | GCCATGGAGGCCAGTGAATTCATGGCATC<br>AACATTCACGAG | CAGCTCGAGCTCGATGGATCCTCATGTGCT<br>ACGAGTAGAG |

## Supplemental Table 7

### Primer sequences for site-directed mutagenesis of DkERF10/19 promoters

| Gene       | Gene-specific primer (5' to 3')                                                                                         | Nested gene-specific primer (5' to 3')                                                                                      |
|------------|-------------------------------------------------------------------------------------------------------------------------|-----------------------------------------------------------------------------------------------------------------------------|
| DkERF9m    | CTCATATATAAACGTTCTTCACCATGT<br>A                                                                                        | AAGGAACGTTTATATATGAGACGCGCG<br>GC                                                                                           |
| DkERF10m   | AGCTTTCGTTATAGTTAATATTTGCGACCC                                                                                          | TATTA ACTATAACGAAAGCTCAATTTATG<br>T                                                                                         |
| DkERF19m-1 | CTTTGATACCAACCATTTCGACCACGAC<br>GGGTACCGAACGTTATTTGAATTCC<br>ATCACAGCAAAACCTCCTCCACACGTC<br>AGTGAAAGGAGAAATAACCTCCCATGG | AATGGTTGGTATCAAAGTGAGTAGTAA<br>TAACGTTCCGTACCCAATTCGCCCTATAG<br>AGGAGGGTTTTGCTGTGATGACGACGTC<br>GTTATTTCTCCTTCACTTCTTGTTCTT |
| DkERF19m-2 | GAAAGCTTTATCCAGAGCTGAAAGAGAG                                                                                            | GCTCTGGATAAAGCTTTCGTCTTCATTCA                                                                                               |

**Table S8.** A summary on AHCA responsive transcription factors from persimmon fruit

| Gene name | GenBank No. | N-end MC domain | Family                   | Responsive to deastringency treatment (95% CO <sub>2</sub> , 4% N <sub>2</sub> , 1% O <sub>2</sub> ) | Putative functions in fruit | Reference                                                                       |
|-----------|-------------|-----------------|--------------------------|------------------------------------------------------------------------------------------------------|-----------------------------|---------------------------------------------------------------------------------|
| DkERF1    | JN256071    | No              | Ethylene response factor | Up-regulation                                                                                        |                             | Min <i>et al.</i> J Exp Bot, 2012                                               |
| DkERF4    | JN256074    | No              | Ethylene response factor | Up-regulation                                                                                        |                             | Min <i>et al.</i> J Exp Bot, 2012                                               |
| DkERF5    | JN256075    | No              | Ethylene response factor | Up-regulation                                                                                        |                             | Min <i>et al.</i> J Exp Bot, 2012                                               |
| DkERF6    | JN256076    | No              | Ethylene response factor | Up-regulation                                                                                        |                             | Min <i>et al.</i> J Exp Bot, 2012                                               |
| DkERF8    | JN256078    | No              | Ethylene response factor | Up-regulation                                                                                        | Softening                   | Wang <i>et al.</i> Plant Biotechnol J, 2017                                     |
| DkERF9    | JX117848    | No              | Ethylene response factor | Up-regulation                                                                                        | Deastringency               | Min <i>et al.</i> J Exp Bot, 2012                                               |
| DkERF10   | JX145122    | Yes             | Ethylene response factor | Up-regulation                                                                                        | Deastringency               | Min <i>et al.</i> J Exp Bot, 2012                                               |
| DkERF11   | KJ170911    | No              | Ethylene response factor | Up-regulation                                                                                        |                             | Min <i>et al.</i> PLoS ONE, 2014                                                |
| DkERF12   | KJ170912    | No              | Ethylene response factor | Up-regulation                                                                                        |                             | Min <i>et al.</i> PLoS ONE, 2014                                                |
| DkERF13   | KJ170913    | No              | Ethylene response factor | Up-regulation                                                                                        |                             | Min <i>et al.</i> PLoS ONE, 2014                                                |
| DkERF14   | KJ170914    | No              | Ethylene response factor | Up-regulation                                                                                        |                             | Min <i>et al.</i> PLoS ONE, 2014                                                |
| DkERF15   | KJ170915    | No              | Ethylene response factor | Up-regulation                                                                                        |                             | Min <i>et al.</i> PLoS ONE, 2014                                                |
| DkERF16   | KJ170916    | No              | Ethylene response factor | Up-regulation                                                                                        | Softening                   | Wang <i>et al.</i> Plant Biotechnol J, 2017                                     |
| DkERF17   | KJ170917    | No              | Ethylene response factor | Up-regulation                                                                                        |                             | Min <i>et al.</i> PLoS ONE, 2014                                                |
| DkERF18   | KJ170918    | No              | Ethylene response factor | Up-regulation                                                                                        | Deastringency               | Min <i>et al.</i> PLoS ONE, 2014                                                |
| DkERF19   | KJ170919    | No              | Ethylene response factor | Up-regulation                                                                                        | Deastringency<br>Softening  | Min <i>et al.</i> PLoS ONE, 2014<br>Wang <i>et al.</i> Plant Biotechnol J, 2017 |
| DkERF20   | KJ170920    | No              | Ethylene response factor | Up-regulation                                                                                        |                             | Min <i>et al.</i> PLoS ONE, 2014                                                |
| DkERF21   | KJ170921    | No              | Ethylene response factor | Up-regulation                                                                                        | Deastringency               | Min <i>et al.</i> PLoS ONE, 2014                                                |
| DkERF22   | KJ170922    | No              | Ethylene response factor | Up-regulation                                                                                        | Deastringency               | Min <i>et al.</i> PLoS ONE, 2014                                                |
| DkMYB5    | KP875528    | No              | MYB                      | Up-regulation                                                                                        |                             | Fang <i>et al.</i> Postharvest Biol Technol, 2016                               |
| DkMYB6    | KP875529    | No              | MYB                      | Up-regulation                                                                                        | Deastringency               | Fang <i>et al.</i> Postharvest Biol Technol, 2016                               |

|         |          |    |                          |               |               |                                                   |
|---------|----------|----|--------------------------|---------------|---------------|---------------------------------------------------|
| DkMYB7  | KP875530 | No | MYB                      | Up-regulation |               | Fang <i>et al.</i> Postharvest Biol Technol, 2016 |
| DkMYB8  | KP875531 | No | MYB                      | Up-regulation |               | Fang <i>et al.</i> Postharvest Biol Technol, 2016 |
| DkbHLH1 | KY849612 | No | bHLH                     | Up-regulation |               | This publication                                  |
| DkbHLH2 | KY849613 | No | bHLH                     | Up-regulation |               | This publication                                  |
| DkMYB9  | KY849603 | No | MYB                      | Up-regulation |               | This publication                                  |
| DkMYB10 | KY849604 | No | MYB                      | Up-regulation | Deastringency | This publication                                  |
| DkMYB11 | KY849605 | No | MYB                      | Up-regulation |               | This publication                                  |
| DkMYB12 | KY849606 | No | MYB                      | Up-regulation |               | This publication                                  |
| DkMYB13 | KY849607 | No | MYB                      | Up-regulation |               | This publication                                  |
| DkRH2-1 | KY849614 | No | Ring finger protein      | Up-regulation |               | This publication                                  |
| DkRH2-2 | KY849615 | No | Ring finger protein      | Up-regulation |               | This publication                                  |
| DkGT3-1 | KY849616 | No | MYB-like                 | Up-regulation |               | This publication                                  |
| DkAN1-1 | KY849617 | No | Zinc finger              | Up-regulation |               | This publication                                  |
| DkIAA1  | KY849618 | No | Auxin-responsive protein | Up-regulation |               | This publication                                  |
| DkHSF1  | KY849619 | No | Heat shock factor        | Up-regulation |               | This publication                                  |

---
